# Supplementary material
Source: ML conference proceedings conference paper supplement (https://proceedings.mlr.press/v157/liu21e.html)
Supplement: Supplementary file [file liu21e-supp.pdf]

## 1. Supplementary material

**Lemma 1 (Lemma 14 in Appendix)** *Let  $G_1$  and  $G_2$  be two zero mean Gaussian distributions with covariance matrix  $\mathbf{\Gamma}\mathbf{\Sigma}\mathbf{\Gamma}$  and  $\mathbf{\Gamma}\mathbf{\Theta}\mathbf{\Gamma}$ . Furthermore  $\mathbf{\Sigma}$  and  $\mathbf{\Theta}$  are positive definite matrices. If there exists  $(i, j)$  such that*

$$|\mathbf{\Sigma}_{i,j} - \mathbf{\Theta}_{i,j}| \geq \delta(\mathbf{\Sigma}_{i,i} + \mathbf{\Theta}_{i,i} + \mathbf{\Sigma}_{j,j} + \mathbf{\Theta}_{j,j}), \quad (1)$$

then the total variation distance between  $G_1$  and  $G_2$  is at least  $\frac{1}{12e^{1/4}}\delta$ .

**Proof** Given  $\phi_1(u)$  and  $\phi_2(u)$  as characteristic function of  $G_1$  and  $G_2$  respectively. Due to Lemma 2 in (Moridomi et al., 2018), we have

$$\int_x |G_1(x) - G_2(x)| dx \geq \max_{u \in \mathbb{R}^N} |\phi_1(u) - \phi_2(u)|, \quad (2)$$

so we only need to show the lower bound of  $\max_{u \in \mathbb{R}^N} |\phi_1(u) - \phi_2(u)|$ .

Then we set that characteristic function of  $G_1$  and  $G_2$  are  $\phi_1(u) = e^{\frac{-1}{2}u^T \mathbf{\Gamma}^T \mathbf{\Sigma} \mathbf{\Gamma} u}$  and  $\phi_2(u) = e^{\frac{-1}{2}u^T \mathbf{\Gamma}^T \mathbf{\Theta} \mathbf{\Gamma} u}$  respectively. Set that  $\alpha_1 = (\mathbf{\Gamma}v)^T \mathbf{\Sigma} (\mathbf{\Gamma}v)$ ,  $\alpha_2 = (\mathbf{\Gamma}v)^T \mathbf{\Theta} (\mathbf{\Gamma}v)$  and  $\mathbf{\Gamma}u = \frac{\mathbf{\Gamma}v}{\sqrt{\alpha_1 + \alpha_2}}$ . Moreover we denote that  $\bar{v} = \mathbf{\Gamma}v$ , for any  $\bar{v} \in \mathbb{R}^V$ , there exists  $v \in \mathbb{R}^V$ .  $\bar{u} = \mathbf{\Gamma}u$  in the same way.

We need only give the lower bound of  $\max_{u \in \mathbb{R}^N} |\phi_1(u) - \phi_2(u)|$ .

Next we have that

$$\begin{aligned} & \max_{u \in \mathbb{R}^N} |\phi_1(u) - \phi_2(u)| \\ &= \max_{u \in \mathbb{R}^N} \left| e^{\frac{-1}{2}u^T \mathbf{\Gamma}^T \mathbf{\Sigma} \mathbf{\Gamma} u} - e^{\frac{-1}{2}u^T \mathbf{\Gamma}^T \mathbf{\Theta} \mathbf{\Gamma} u} \right| \\ &= \max_{u \in \mathbb{R}^V} \left| e^{\frac{-1}{2}(\mathbf{\Gamma}u)^T \mathbf{\Sigma} (\mathbf{\Gamma}u)} - e^{\frac{-1}{2}(\mathbf{\Gamma}u)^T \mathbf{\Theta} (\mathbf{\Gamma}u)} \right| \\ &\geq \max_{\bar{v} \in \mathbb{R}^N} \left| e^{\frac{-\alpha_1}{2(\alpha_1 + \alpha_2)}} - e^{\frac{-\alpha_2}{2(\alpha_1 + \alpha_2)}} \right| \\ &\geq \max_{\bar{v} \in \mathbb{R}^N} \left| \frac{1}{2e^{1/4}} \frac{\alpha_1 - \alpha_2}{\alpha_1 + \alpha_2} \right|. \end{aligned} \quad (3)$$

Then second inequality is due to Lemma 5, since  $\min\{\frac{\alpha_1}{\alpha_1 + \alpha_2}, \frac{\alpha_2}{\alpha_1 + \alpha_2}\} \in (0, \frac{1}{2}]$ .

Due to assumption in the Lemma we obtain for some  $(i, j)$  that

$$\begin{aligned} & \delta(\mathbf{\Sigma}_{i,i} + \mathbf{\Theta}_{i,i} + \mathbf{\Sigma}_{j,j} + \mathbf{\Theta}_{j,j}) \leq |\mathbf{\Sigma}_{i,j} - \mathbf{\Theta}_{i,j}| \\ &= \frac{1}{2} |(\mathbf{e}_i + \mathbf{e}_j)^T (\mathbf{\Sigma} - \mathbf{\Theta})(\mathbf{e}_i + \mathbf{e}_j) - \mathbf{e}_i^T (\mathbf{\Sigma} - \mathbf{\Theta}) \mathbf{e}_i - \mathbf{e}_j^T (\mathbf{\Sigma} - \mathbf{\Theta}) \mathbf{e}_j| \end{aligned} \quad (4)$$

It implies that one of  $(\mathbf{e}_i + \mathbf{e}_j)^T (\mathbf{\Sigma} - \mathbf{\Theta})(\mathbf{e}_i + \mathbf{e}_j)$ ,  $\mathbf{e}_i^T (\mathbf{\Sigma} - \mathbf{\Theta}) \mathbf{e}_i$  and  $\mathbf{e}_j^T (\mathbf{\Sigma} - \mathbf{\Theta}) \mathbf{e}_j$  has absolute value greater than  $\frac{2\delta}{3}(\mathbf{\Sigma}_{i,i} + \mathbf{\Theta}_{i,i} + \mathbf{\Sigma}_{j,j} + \mathbf{\Theta}_{j,j})$ .

Since  $\mathbf{\Sigma}, \mathbf{\Theta}$  are strictly positive definite matrices, we have that for all  $v \in \{\mathbf{e}_i + \mathbf{e}_j, \mathbf{e}_i, \mathbf{e}_j\}$

$$v^T (\mathbf{\Sigma} + \mathbf{\Theta}) v \leq 2(\mathbf{\Sigma} + \mathbf{\Theta})_{i,i} + 2(\mathbf{\Sigma} + \mathbf{\Theta})_{j,j}. \quad (5)$$

and therefore we have that

$$\max_{\bar{v} \in \mathbb{R}^N} \left| \frac{1}{2e^{1/4}} \frac{\alpha_1 - \alpha_2}{\alpha_1 + \alpha_2} \right| \geq \max_{\bar{v} \in \{\mathbf{e}_i + \mathbf{e}_j, \mathbf{e}_i, \mathbf{e}_j\}} \left| \frac{1}{2e^{1/4}} \frac{v^T(\boldsymbol{\Sigma} - \boldsymbol{\Theta})v}{v^T(\boldsymbol{\Sigma} + \boldsymbol{\Theta})v} \right| \geq \frac{\delta}{6e^{1/4}} \quad (6)$$

■

Now we give the proof of the Main Theorem as follows:

**Proof** [Proof of Theorem 2] Due to Lemma 4 (in main part) we obtain that

$$\text{Regret}_{\text{OSDP}}(T, \mathcal{K}, \mathcal{L}, \mathbf{W}^*) \leq \frac{H_0}{\eta} + \frac{\eta}{s} T. \quad (7)$$

Due to the main proposition in main part we know that  $s = 1/(1152(\beta + \rho\epsilon)^2\sqrt{e}g^2)$ .

Thus we need only to show  $H_0 \leq \frac{\tau}{\epsilon}$ . Given  $\mathbf{W}_0$  and  $\mathbf{W}_1$  is the minimizer and maximizer of  $R$  respectively, then we obtain that

$$\begin{aligned} \max_{\mathbf{W}, \mathbf{W}' \in \mathcal{K}} (R(\mathbf{W}) - R(\mathbf{W}')) &= R(\mathbf{W}_1) - R(\mathbf{W}_0) \\ &= -\ln \det(\boldsymbol{\Gamma}\mathbf{W}_1\boldsymbol{\Gamma} + \epsilon\mathbf{E}) + \ln \det(\boldsymbol{\Gamma}\mathbf{W}_0\boldsymbol{\Gamma} + \epsilon\mathbf{E}) \\ &= \sum_{i=1}^N \ln \frac{\lambda_i(\boldsymbol{\Gamma}\mathbf{W}_0\boldsymbol{\Gamma}) + \epsilon}{\lambda_i(\boldsymbol{\Gamma}\mathbf{W}_1\boldsymbol{\Gamma}) + \epsilon} \\ &= \sum_{i=1}^N \ln \left( \frac{\lambda_i(\boldsymbol{\Gamma}\mathbf{W}_0\boldsymbol{\Gamma})}{\lambda_i(\boldsymbol{\Gamma}\mathbf{W}_1\boldsymbol{\Gamma}) + \epsilon} + \frac{\epsilon}{\lambda_i(\boldsymbol{\Gamma}\mathbf{W}_1\boldsymbol{\Gamma}) + \epsilon} \right) \\ &\leq \sum_{i=1}^N \ln \left( \frac{\lambda_i(\boldsymbol{\Gamma}\mathbf{W}_0\boldsymbol{\Gamma})}{\epsilon} + 1 \right) \\ &\leq \sum_{i=1}^N \frac{\lambda_i(\boldsymbol{\Gamma}\mathbf{W}_0\boldsymbol{\Gamma})}{\epsilon} = \frac{\text{Tr}(\boldsymbol{\Gamma}\mathbf{W}_0\boldsymbol{\Gamma})}{\epsilon} \leq \frac{\tau}{\epsilon}. \end{aligned} \quad (8)$$

Plugging  $s$ , we obtain that

$$\text{Regret}_{\text{OSDP}}(T, \mathcal{K}, \mathcal{L}, \mathbf{W}^*) = O \left( g^2(\beta + \rho\epsilon)^2 T \eta + \frac{\tau}{\epsilon \eta} \right). \quad (9)$$

■

**Lemma 2 (Lemma A.1 (Moridomi et al., 2018))** Let  $P$  and  $Q$  be probability distributions over  $\mathbb{R}^N$  and  $\phi_P(u)$  and  $\phi_Q(u)$  be their characteristic functions, respectively. Then

$$\max_{u \in \mathbb{R}^N} |\phi_P(u) - \phi_Q(u)| \leq \int_x |P(x) - Q(x)| dx, \quad (10)$$

the right hand side is the total variation distance between any distribution  $Q$  and  $P$ .

**Lemma 3 (Lemma A.2 (Christiano, 2014))** *Let  $P$  and  $Q$  be probability distributions over  $\mathbb{R}^N$  with total variation distance  $\delta$ . Then*

$$H(\alpha P + (1 - \alpha)Q) \leq \alpha H(P) + (1 - \alpha)H(Q) - \alpha(1 - \alpha)\delta^2, \quad (11)$$

where  $H(P) = \mathbb{E}_{x \sim P}[\ln P(x)]$ .

**Lemma 4 (Lemma A.3 (Moridomi et al., 2018))** *For any probability distribution  $P$  over  $\mathbb{R}^N$  with zero mean and covariance matrix  $\Sigma$ , its entropy is bounded by the log-determinant of covariance matrix. That is*

$$-H(P) \leq \frac{1}{2} \ln(\det(\Sigma)(2\pi e)^N). \quad (12)$$

**Lemma 5 (Lemma A.4 (Moridomi et al., 2018))**

$$e^{-\frac{x}{2}} - e^{-\frac{1-x}{2}} \geq \frac{e^{-1/4}}{2}(1 - 2x), \quad (13)$$

for  $0 \leq x \leq 1/2$ .

## 2. Definition of biclustered structure and ideal quasi dimension

As in Herbster et al. (2020), we define the class of  $(k, l)$ -biclustered structure matrices as follows:

**Definition 6** *For  $m \geq k$  and  $n \geq l$ , the class of  $(k, l)$ -binary biclustered matrices is defined as*

$$\mathbb{B}_{k,l}^{m \times n} = \{\mathbf{U} \in \{-1, +1\}^{m \times n} : \mathbf{r} \in [k]^m, \mathbf{c} \in [l]^n, \mathbf{V} \in \{1, -1\}^{k \times l}, \mathbf{U}_{i,j} = \mathbf{V}_{r_i, c_j}, i \in [m], j \in [n]\}.$$

Denote  $\mathcal{B}^{m,d} = \{\mathbf{R} \subset \{0, 1\}^{m \times d} : \|\mathbf{R}_i\|_2 = 1, i \in [m], \text{rank}(\mathbf{R}) = d\}$ , for any matrix  $\mathbf{U} \in \mathbb{B}_{k,l}^{m,n}$  we can decompose  $\mathbf{U} = \mathbf{R}\mathbf{U}^*\mathbf{C}^\top$  for some  $\mathbf{U}^* \in \{-1, +1\}^{k \times l}$ ,  $\mathbf{R} \in \mathcal{B}^{m,k}$  and  $\mathbf{C} \in \mathcal{B}^{n,l}$ .

**Theorem 7 ((Herbster et al., 2020))** *If  $\mathbf{U} \in \mathbb{B}_{k,l}^{m \times n}$  define  $\mathcal{D}_{\mathbf{M}, \mathbf{N}}^o(\mathbf{U})$  as*

$$\mathcal{D}_{\mathbf{M}, \mathbf{N}}^o(\mathbf{U}) = 2\text{Tr}(\mathbf{R}^\top \mathbf{M} \mathbf{R})\alpha_{\mathbf{M}} + 2\text{Tr}(\mathbf{C}^\top \mathbf{N} \mathbf{C})\alpha_{\mathbf{N}} + 2k + 2l, \quad (14)$$

where  $\mathbf{M}, \mathbf{N}$  are PD-Laplacian, as the minimum over all decompositions of  $\mathbf{U} = \mathbf{R}\mathbf{U}^*\mathbf{C}^\top$  for some  $\mathbf{U}^* \in \{-1, +1\}^{k \times l}$ ,  $\mathbf{R} \in \mathcal{B}^{m,k}$  and  $\mathbf{C} \in \mathcal{B}^{n,l}$ . Thus, for  $\mathbf{U} \in \mathbb{B}_{k,l}^{m \times n}$ ,

$$\mathcal{D}_{\mathbf{M}, \mathbf{N}}^\gamma(\mathbf{U}) \leq \mathcal{D}_{\mathbf{M}, \mathbf{N}}^o(\mathbf{U}), \quad (15)$$

if  $\|\mathbf{U}\|_{\max} \leq \frac{1}{\gamma}$ .

Moreover, we define the max-norm of a matrix  $\mathbf{U} \in \mathbb{R}^{m \times n}$  as follows:

$$\|\mathbf{U}\|_{\max} = \min_{\mathbf{P}\mathbf{Q}^\top = \mathbf{U}} \left\{ \max_{1 \leq i \leq m} \|\mathbf{P}_i\| \max_{1 \leq j \leq n} \|\mathbf{Q}_j\| \right\}. \quad (16)$$

Furthermore we define the quasi-dimension of a matrix  $\mathbf{U}$  with  $\mathbf{M} \in \mathbb{S}_{++}^{m \times m}$  and  $\mathbf{N} \in \mathbb{S}_{++}^{n \times n}$  at margin  $\gamma$  as

$$\mathcal{D}_{\mathbf{M}, \mathbf{N}}^\gamma(\mathbf{U}) = \min_{\bar{\mathbf{P}}\bar{\mathbf{Q}}^\top = \gamma\mathbf{U}} \alpha_M \text{Tr}(\bar{\mathbf{P}}^\top \mathbf{M} \bar{\mathbf{Q}}) + \alpha_N \text{Tr}(\bar{\mathbf{Q}}^\top \mathbf{N} \bar{\mathbf{Q}}). \quad (17)$$

See section 4.1 from [Herbster et al. \(2020\)](#), if  $\mathbf{U}$  is a  $(k, l)$ -biclustered structured matrix, they show an example where  $\mathcal{D}_{\mathbf{M}, \mathbf{N}}^\gamma(\mathbf{U}) \in O(k + l)$  with ideal side information. When exactly that there exists a sequence that  $y_t = (\bar{\mathbf{P}}\bar{\mathbf{Q}}^\top)_{i_t, j_t} = \mathbf{U}_{i_t, j_t}$  where  $(\bar{\mathbf{P}}, \bar{\mathbf{Q}}) = \arg \min_{\mathbf{P}, \mathbf{Q}} \mathcal{D}_{\mathbf{M}, \mathbf{N}}^\gamma(\mathbf{U})$ , and  $\mathbf{U}$  satisfies the assumptions in [Herbster et al. \(2020\)](#), then we have that  $\hat{\mathbf{D}} \in O(k + l)$  with same side information.

### 3. Online similarity prediction with side information

In this section, we show the application of our reduction method and generalised log-determinant regularizer to online similarity prediction with side information.

Let  $G = (V, E)$  be an undirected and connected graph with  $n = |V|$  vertices and  $m = |E|$  edges. Assign vertices to  $K$  classes with a vector  $\mathbf{y} = \{y_1, \dots, y_n\}$  where  $y_i \in \{1, \dots, K\}$ . For a matrix  $\mathbf{L}$ , we denote  $\mathbf{L}^+$  as pseudo-inverse matrix of  $\mathbf{L}$ . The online similarity prediction is defined as follows: On each round  $t$ , for a given pair of vertices  $(i_t, j_t)$  algorithm needs to predict whether they are in the same class denoted as  $\hat{y}_{i_t, j_t}$ . If they are in the same class then  $y_{i_t, j_t} = 1$ ,  $y_{i_t, j_t} = -1$ , otherwise. Our target is to give a bound of the prediction mistakes  $M = \sum_{t=1}^T \mathbb{1}_{\hat{y}_{i_t, j_t} \neq y_{i_t, j_t}}$ .

**Definition 8** *The set of cut-edges in  $(G, \mathbf{y})$  is denoted as  $\Phi^G(\mathbf{y}) = \{(i, j) \in E : y_i \neq y_j\}$  we abbreviate it to  $\Phi^G$  and the cut-size is given as  $|\Phi^G(\mathbf{y})|$ . The set of cut-edges with respect to class label  $k$  is denoted as  $\Phi_k^G(\mathbf{y}) = \{(i, j) \in E : k \in \{y_i, y_j\}, y_i \neq y_j\}$ . Note that  $\sum_{s=1}^k |\Phi_s^G(\mathbf{y})| = 2|\Phi^G(\mathbf{y})|$ . Given  $\mathbf{A} \in \mathbb{R}^{n \times n}$  such that  $\mathbf{A}_{ij} = \mathbf{A}_{ji} = 1$  if  $(i, j) \in E(G)$  and  $\mathbf{A}_{ij} = 0$ , otherwise.  $\mathbf{D}$  is denoted as diagonal matrix with  $\mathbf{D}_{ii}$  is the degree of vertex  $i$ . We define the Laplacian as  $\mathbf{L} = \mathbf{D} - \mathbf{A}$ .*

**Definition 9** *If  $G$  is identified with a resistive network such that each edge is a unit resistor, then the effective resistance  $R_{i,j}^G$  between pair  $(i, j) \in V^2$  can be defined as  $R_{i,j}^G = (e_i - e_j)\mathbf{L}^+(e_i - e_j)$ , where  $e_i$  is the  $i$ -th vector in the canonical basis of  $\mathbb{R}^n$ .*

[Gentile et al. \(2013\)](#) gave a mistake bound in the following proposition:

**Proposition 10** *Let  $(G, \mathbf{y})$  be a labeled graph. If we run the Matrix Winnow with  $G$  as input graph, we have the following mistake bound*

$$M^W = O \left( |\Phi^G| \max_{(i,j) \in V^2} R_{i,j}^G \ln n \right) \quad (18)$$

In our new reduction, we define the comparator matrix  $\mathbf{U} \in \{1, -1\}^{n \times n}$  where if vertices  $i, j$  are in the same class then  $\mathbf{U}_{ij} = 1$ , and  $\mathbf{U}_{ij} = -1$ , otherwise. Firstly, we denote that  $\mathbf{1}$  is a  $K$ -dimensional vector that all entries are 1. Due to (Gentile et al., 2013; Herbster et al., 2020), we see that  $\mathbf{U}$  is a  $(K, K)$ -biclustered  $n \times n$  matrix where  $\mathbf{U}^* = 2\mathbf{I}_K - \mathbf{1}\mathbf{1}^\top$ , and there exists  $\mathbf{R} \in \mathcal{B}^{n, k}$  such that  $\mathbf{U} = \mathbf{R}\mathbf{U}^*\mathbf{R}^\top$ . Define the side information matrices  $\mathbf{M} = \mathbf{N} \in \mathbb{R}^{n \times n}$  as PD-Laplacian  $\tilde{\mathbf{L}}$ , where  $\mathbf{L}$  is the Laplacian matrix based on the graph  $G$ .

Thus we have

$$\mathbf{\Gamma} = \begin{bmatrix} \sqrt{\alpha_{\tilde{\mathbf{L}}}} & 0 \\ 0 & \sqrt{\alpha_{\tilde{\mathbf{L}}}} \end{bmatrix}, \quad (19)$$

where  $\alpha_{\tilde{\mathbf{L}}} = \max_i(\tilde{\mathbf{L}}^{-1})_{ii}$ .

According to Herbster et al. (2020), we further obtain that  $\frac{1}{\gamma} \in O(1)$ , more concisely we can set that  $\frac{1}{\gamma} = 3$ . Meanwhile given sparse matrix  $\mathbf{Z}$  in the following equation

$$\mathbf{Z}\langle i, j \rangle = \frac{1}{2}(\mathbf{e}_i \mathbf{e}_{n+j}^\top + \mathbf{e}_{n+j} \mathbf{e}_i^\top). \quad (20)$$

Thus we give the following proposition for our reduction from a graph based online similarity prediction to a generalised OSDP problem  $(\mathcal{K}, \mathcal{L})$  with bounded  $\mathbf{\Gamma}$ -trace norm.

**Proposition 11** *Given an online similarity prediction problem with graph  $(G, \mathbf{y})$ , then we can reduce this problem to a generalised OSDP problem  $(\mathcal{K}, \mathcal{L})$  with bounded  $\mathbf{\Gamma}$ -trace norm such that*

$$\begin{aligned} \mathcal{K} &= \left\{ \mathbf{X} \in \mathbb{S}_{++}^{n \times n} : |\mathbf{X}_{ii}| \leq 1, \text{Tr}(\mathbf{\Gamma}\mathbf{X}\mathbf{\Gamma}) \leq \widehat{\mathcal{D}} \right\} \\ \mathcal{L} &= \{c\mathbf{Z}\langle i, j \rangle : c \in \{-1/\gamma, 1/\gamma\}, i \in [n], j \in [n]\}, \end{aligned}$$

where  $\mathbf{\Gamma}$  is defined as above, and  $\widehat{\mathcal{D}}$  is arbitrary. In particular, we have that

$$M = \sum_{t=1}^T \mathbb{I}_{\hat{y}_{i_t, j_t} \neq y_{i_t, j_t}} \leq \text{Regret}_{\text{OSDP}}(M, \mathcal{K}, \mathcal{L}) \quad (21)$$

According to Herbster et al. (2020), there exists  $\bar{\mathbf{P}}, \bar{\mathbf{Q}}$  such that  $\mathbf{U}^* = \bar{\mathbf{P}}\bar{\mathbf{Q}}^\top$ , it implies that the hinge loss  $\text{hloss}(\mathcal{S}, \gamma) = 0$ .

**Remark 12** *According to Theorem 3 and section 4.2 in (Herbster et al., 2020) if  $\mathbf{U}$  obtains the  $(K, K)$ -biclustered structure, i.e., there exists  $\mathbf{U}^*$ , such that  $\mathbf{U}^* = 2\mathbf{I}_K - \mathbf{1}\mathbf{1}^\top$ , and there exists  $\mathbf{R} \in \mathcal{B}^{n, k}$  such that  $\mathbf{U} = \mathbf{R}\mathbf{U}^*\mathbf{R}^\top$ , due to our Theorem 13 in main part, we have that*

$$M \leq O\left(\text{Tr}(\mathbf{R}^\top \mathbf{L} \mathbf{R}) \alpha_{\mathbf{L}}\right), \quad (22)$$

where  $\mathbf{L}$  is Laplacian of the corresponding graph  $G$ .

**Remark 13** According to [Herbster et al. \(2020\)](#), we have that

$$\text{Tr}(\mathbf{R}^\top \mathbf{L} \mathbf{R}) \leq 2 \sum_{(i,j) \in E} \|\mathbf{R}_i - \mathbf{R}_j\|^2,$$

where  $\sum_{(i,j) \in E} \|\mathbf{R}_i - \mathbf{R}_j\|^2$  counts only when there is an edge between different classes. Due to the definition of  $|\Phi^G|$ , we have that  $\sum_{(i,j) \in E} \|\mathbf{R}_i - \mathbf{R}_j\|^2 = |\Phi^G|$ .

Simultaneously,  $\alpha_{\mathbf{L}} = \max_{i \in [n]} \mathbf{L}_{ii}^+$  so we obtain that  $\alpha_{\mathbf{L}} \geq \mathbf{e}_i^\top \mathbf{L}^+ \mathbf{e}_i, \forall i \in [n]$ . It implies that  $4\alpha_{\mathbf{L}} \geq \max_{(i,j) \in V^2} R_{i,j}^G$ . Thus we have that our new mistake bound improves the previous bound a logarithmic factor and recovers the previous bound up to a constant factor.

## References

- Paul Christiano. Online local learning via semidefinite programming. In *Proceedings of the forty-sixth annual ACM symposium on Theory of computing*, pages 468–474. ACM, 2014.
- Claudio Gentile, Mark Herbster, and Stephen Pasteris. Online similarity prediction of networked data from known and unknown graphs. In *Conference on Learning Theory*, pages 662–695, 2013.
- Mark Herbster, Stephen Pasteris, and Lisa Tse. Online matrix completion with side information. *Advances in Neural Information Processing Systems*, 33, 2020.
- Ken-ichiro Moridomi, Kohei Hatano, and Eiji Takimoto. Online linear optimization with the log-determinant regularizer. *IEICE Transactions on Information and Systems*, 101(6):1511–1520, 2018.
